1 The microbiota influences the *Drosophila melanogaster* life history strategy

2

3 Amber W. Walters<sup>a</sup>, Melinda K. Matthews<sup>a</sup>, Rachel Hughes<sup>a</sup>, Jaanna Malcolm<sup>a</sup>, Seth

4 Rudman<sup>b</sup>, Peter D. Newell<sup>c</sup>, Angela E. Douglas<sup>d</sup>, Paul S. Schmidt<sup>b</sup>, John M. Chaston<sup>a,1</sup>

5

6 <sup>a</sup> Department of Plant and Wildlife Sciences, Brigham Young University, Provo, UT 84602

7 <sup>b</sup> Department of Biology, University of Pennsylvania, Philadelphia, PA, 19104

8 <sup>c</sup> Department of Biological Sciences, SUNY Oswego, Oswego, NY, USA, 13126

9 <sup>d</sup> Department of Entomology and Department of Molecular Biology and Genetics, Cornell

10 University, Ithaca, NY, USA, 14853

11

12 <sup>1</sup> To whom correspondence should be addressed [john\\_chaston@byu.edu](mailto:john_chaston@byu.edu)

13

14 Short title: Microbiota influence *Drosophila melanogaster* life history strategy

15

16 Keywords: life history, local adaptation, *Drosophila*, microbiota, microbiome, latitude, acetic acid

17 bacteria, lactic acid bacteria

18

19 **Abstract**

20 Organismal life history traits are ideally adapted to local environments when an organism has a  
21 fitness advantage in one location relative to conspecifics from other geographies. Local  
22 adaptation has been best studied across, for example, latitudinal gradients, where organisms  
23 may tradeoff between investment in traits that maximize one, but not both, fitness components  
24 of somatic maintenance or reproductive output in the context of finite environmental resources.  
25 Latitudinal gradients in life history strategies are traditionally attributed to environmentally  
26 mediated selection on an animal's genotype, without any consideration of the possible impact of  
27 associated microorganisms ('microbiota') on life history traits. Here we show that in *Drosophila*  
28 *melanogaster*, a key organism for studying local adaptation and life history strategies,  
29 associated microorganisms can drive life history variation. First, we reveal that an isogenic fly  
30 line reared with different bacteria vary the investment in early reproduction versus somatic  
31 maintenance, with little resultant variation in lifetime fitness. Next, we show that in wild  
32 *Drosophila* the abundance of these same bacteria was correlated with the latitude and life  
33 history strategy of the flies, and bacterial abundance was driven at least in part by host genetic  
34 selection. Finally, by eliminating or manipulating the microbiota of fly lines collected across a  
35 latitudinal gradient, we reveal that host genotype contributes to latitude-specific life history traits  
36 independent of the microbiota; but that the microbiota can override these host genetic  
37 adaptations. Taken together, these findings establish the microbiota as an essential  
38 consideration in local adaptation and life history evolution.

39 **Significance statement**

40 Explanations of local adaptation have historically focused on how animal genotypes respond to  
41 environmental selection. Although the impact of variation in host life histories on the composition  
42 of the microbiota has been investigated for many associations, the scale and pattern of  
43 microbial effects on host life history strategy are largely unknown. Here we demonstrate in the  
44 fruit fly *Drosophila melanogaster* that microbiota effects on host life history strategy in the  
45 laboratory are matched by patterns of microbiota composition in wild host populations. In  
46 particular, microbiota composition varies with latitude and the effects of the microbiota on life  
47 history traits are greater than host genetic adaptations. Together, these findings demonstrate  
48 that the microbiota plays an important role in local adaptation.

49

## 50 **Introduction**

51 Life history tradeoffs have long been recognized as a widespread feature of local adaptation  
52 and have been the focus of many empirical studies (1, 2). An animal's life history reflects its  
53 allocation of resources and time to maximize reproductive output, subject to natural selection  
54 and tradeoffs along a 'fast-slow' continuum (3-5). At the 'fast' end, organisms develop to  
55 reproductive maturity more quickly and have high early fecundity; whereas a 'slow' lifestyle  
56 favors somatic maintenance and lower initial reproduction across longer lifespan (6, 7). These  
57 insights have been developed in the context of an environment-genotype centric framework,  
58 focused on geography-specific environmental selection on the organismal genotype mediated,  
59 for example, by temperature or photoperiod (8, 9). The consequent variation in genotype has  
60 been linked to various physiological and behavioral characters collectively described as the  
61 pace of life syndrome (4, 10).

62

63 The rationale for this study is the abundant evidence that key life history traits (e.g. development  
64 rate, fecundity, lifespan) and correlated physiological traits can be influenced by the presence  
65 and composition of associated microorganisms ('microbiota') (11-17). To date, research on  
66 interactions between microbiota and the life history strategy of the host has focused exclusively  
67 on how inter- and intra- specific variation in host life history strategies influence the microbiota,  
68 e.g. (18, 19). The reverse question –the impact of the microbiota on the life history strategy of  
69 the host, including the evolution of locally-adapted populations – has, to our knowledge rarely  
70 been considered (20), and has not been investigated empirically.

71

72 *Drosophila melanogaster* is an excellent system to address the impact of the microbiota of host  
73 life history strategy because both its life history and microbiota are well-studied. Considering its  
74 life history first, tradeoffs and their role in local adaptation have been demonstrated, especially  
75 in relation to latitudinal clines in allele frequencies for fitness-associated traits (21-25), candidate

76 genes (26-30), and genome-wide patterns (31-33). In particular, *D. melanogaster* adopt different  
77 life history strategies across a latitudinal gradient in the eastern United States. Flies at high  
78 latitudes, e.g. Maine, occupy the ‘slower’, somatic maintenance-promoting end of the fast-slow  
79 continuum (long lifespans and stress survival, high fat storage); whereas flies at low latitudes,  
80 e.g. Florida, invest in rapid development and early reproduction (21, 34, 35). Turning to the gut  
81 microbiota, a growing body of research has revealed that the gut microbiota of *D. melanogaster*  
82 is of low diversity, represented by <100 species, usually dominated by acetic acid bacteria  
83 (AAB) of the family Acetobacteraceae, including *Acetobacter* species, or lactic acid bacteria  
84 (LAB) from the order Lactobacillales, including the genera *Lactobacillus*, *Enterococcus*, and  
85 *Leuconostoc* (36-41). As in many other animals, the *D. melanogaster* microbiota varies both  
86 among individual hosts and over time within an individual animal (42, 43), and this variation is  
87 shaped by both deterministic factors, e.g. host genotype, among-microbe interactions, diet  
88 composition (44-49) and stochastic processes of passive dispersal and ecological drift (50-53).  
89 The gut microbiota of *D. melanogaster* microbiota is also readily manipulated in the laboratory: it  
90 can be eliminated by bleach treatment; the dominant taxa are fully culturable; and microbial  
91 communities of defined composition can be administered by direct inoculation to bleach-  
92 sterilized fly eggs on a sterile diet, generating gnotobiotic flies (54). If no bacteria are reapplied,  
93 the resultant “axenic” insects develop and reproduce with no evidence of generalized malaise  
94 (55).

95  
96 The basis for this study is the observation that presence and composition of the *D.*  
97 *melanogaster* microbiota affect key traits of *D. melanogaster* that underpin life history strategy,  
98 including development rate, lifespan and fecundity (55-63). We hypothesized that the microbiota  
99 might, therefore, influence patterns of local adaptation in *D. melanogaster*. We asked three  
100 questions: 1) How does the microbiota influence traits contributing to the life history strategy of  
101 their host? 2) Does the taxonomic composition of the microbiota in *D. melanogaster* vary with

102 geographical location along the latitudinal cline in eastern USA? 3) What are the relative  
103 contributions of host genotype and the microbiota in shaping local adaptation of the host along  
104 this cline? Using studies of both laboratory and wild populations of *D. melanogaster*, we reveal  
105 that (i) the identity of associated microorganisms influences the position of the flies along the  
106 fast-slow axis; (ii) relative abundances of key members of the microbiota in wild-caught flies  
107 correlate with life history traits and can be determined by host genetic selection; (iii), local  
108 adaptation of the host genotype is independent of the microbiota, but can be masked by  
109 microbiota effects. Together, these findings suggest that microbes are an essential  
110 consideration in evaluating the causal basis for local adaptation in their animal hosts.

111

## 112 **Results**

### 113 *The microbiota influences D. melanogaster life history strategy*

114 In an evaluation of previously collected datasets (59, 60, 64), we noticed correlated influences  
115 of Acetic Acid Bacteria (AABs) and Lactic Acid Bacteria (LABs) on *D. melanogaster* life history  
116 traits. Specifically, the isogenic *D. melanogaster* CantonS line tended to display faster  
117 development rates, higher feeding rates, lower lipid (TAG) levels, and lower starvation  
118 resistance when monoassociated with AABs than LABs, and these correlated relationships were  
119 statistically significant (Fig. 1). The correlations were specific to the investigated traits since  
120 starvation resistance and development and feeding rates were not correlated with glucose  
121 content (Fig. 1), a nutritional index that is not usually considered with other life history traits (65).  
122 Since the trait correlations were consistent with established patterns of life history tradeoffs in *D.*  
123 *melanogaster* (65, 66), we hypothesized that variation in microbial colonization could influence  
124 the position that individual flies occupy along the fast-slow continuum. To test this hypothesis,  
125 we associated the same fly line with many different bacterial strains, and quantified additional  
126 life history traits in *D. melanogaster*: lifespan, and fecundity. Lifespan was positively correlated  
127 with SR and TAG content; but negatively correlated with 'fast' traits (fecundity, development

128 rate, and feeding rate, which were positively correlated); and uncorrelated with glucose content.  
129 Among all tested life history traits, the correlation coefficients were consistent with the predicted  
130 variation along the fast-slow axis, although two correlations with relatively low replication (n=12,  
131 n=14) were not significant (Fig. 1).

132

133 **Figure 1. Microbial variation influences life history patterns in a laboratory reared**

134 **isogenic fly line.** Six life history traits were measured in *D. melanogaster* that were  
135 monoassociated with different bacterial species and reared on a YG diet: whole-body  
136 triacylglyceride content (Triglyceride), survival under starvation conditions (Starvation), lifespan,  
137 the rate of development to pupariation (Development rate), number of pupariating offspring  
138 produced in the first 2-4 days after eclosion (Fecundity), and feeding rate (Feeding). Fly whole  
139 body glucose content (Glucose), a trait that is not correlated with most other life history traits,  
140 was also measured. Mean trait values conferred by different bacteria are plotted in the bottom  
141 half of the table. The top half of the table shows the p-values (p), correlation coefficients (Coef),  
142 and number of different monoassociations (N). Each monoassociation usually had triplicate  
143 measures in three separate experiments. P-values that were significant after a Benjamini-  
144 Hochberg correction are shown in red. The data for triglyceride content, starvation resistance,  
145 development rate, and feeding rate were published previously (59, 60, 64).

146

147 *The microbiota has a greater impact on the temporal pattern of D. melanogaster fecundity than*  
148 *lifetime fitness*

149 To test how the varied influences of different bacteria on fecundity and lifespan impact *D.*  
150 *melanogaster* fitness in the laboratory, we examined a time course of fecundity and longevity  
151 data in a matched set of female flies colonized with different bacteria (54). In the first of two  
152 experiments, we used 5 bacterial species isolated from the guts of the same *D. melanogaster*  
153 strain as used in Fig. 1 experiments (67) and administered either as single species or as a 5-

154 species inoculum, with axenic insects as a control. Total viable offspring per hour did not vary  
155 significantly among the treatments (Fig. 2A), but microbial colonization dramatically affected  
156 early and late *D. melanogaster* fecundity (Fig 2B-C). These effects could not be attributed  
157 exclusively to differences in fly development since the average difference in fly development  
158 was < 12 hours (59). To quantify the fitness consequences of the among-treatment variation in  
159 fecundity and lifespan, we calculated the Eigenvalue lambda from Leslie matrices, using the  
160 data for each vial (68, 69). The only significant fitness difference was between flies reared with  
161 *L. fructivorans* or a 5-species community; fly fitness did not vary significantly among any other  
162 treatments (Fig. 2D).

163

164 **Figure 2. Microbial variation influences *D. melanogaster* fecundity, but not fitness.** A-C)

165 Pupariating offspring per hour produced by female *D. melanogaster* that were monoassociated  
166 with different bacterial species (y-axis). Aggregate intervals were A,E) 12-34 days post egg  
167 deposition (dpd), B,F) 12-13 dpd, or C,G) 32-34 dpd. D,H) Mean fitness lambda, calculated as  
168 the eigenvalue of a Leslie matrix constructed from the fecundity data in A-C or E-G and lifespan  
169 data collected for the same flies. Bar colors represent taxonomic assignments of the strains:  
170 *Acetobacter*, red;  $\gamma$ -proteobacteria, cyan; LABs, blue; non-LAB Firmicutes, purple; bacteria-free,  
171 black; 5-species gnotobiotic, red-blue gradient. N = 9 samples per treatment (triplicate vials in  
172 three separate experiments) except where vials were discarded for contamination or for early  
173 fecundity measures (N=6, two experiments, triplicate vials). KW = Kruskal-Wallis test p-value  
174 and corresponding p-value. If KW  $p > 0.05$ , no post-hoc test was performed. Otherwise,  
175 different letters over the bars represent statistically significant differences by a linear mixed  
176 model and Tukey post-hoc test. X-axis abbreviations are described in Table S4.

177

178 The second experiment tested if the fitness influences were limited to bacteria isolated from  
179 laboratory flies by quantifying the fecundity, lifespan and fitness of *D. melanogaster* individually



180 associated with additional bacterial strains (Fig. 1). Similar trends to the first experiment were  
181 obtained, but with different patterns of significance. As in the first experiments, the *Acetobacter*  
182 species conferred higher early fecundity than the other taxa tested, and, although the effects on  
183 late fecundity were not statistically significant, a fitness differential between *Acetobacter* and the  
184 other bacteria was obtained (Fig. 2 E-H). The common feature of the two complementary  
185 experimental designs is that microorganisms have a stronger impact on the timing of fecundity,  
186 a key life history trait, than on lifetime fitness. Thus, the microbe-dependent differences in  
187 individual traits can lead to variation in the fast-slow strategy without reducing or promoting  
188 fitness.

189

#### 190 *Host genetic selection influences latitudinal variation in D. melanogaster -associated LABs*

191 To investigate the relevance of our laboratory studies to natural populations of *D. melanogaster*,  
192 we turned to the well-studied latitudinal cline in the eastern United States, where low latitude  
193 flies invest more in early reproduction than high-latitude flies (21, 35). We predicted that *D.*  
194 *melanogaster* from low latitude populations would bear *Acetobacter* and related bacterial taxa  
195 (AABs), while *Lactobacillus* and related taxa (LABs) would be associated with populations from  
196 higher latitudes. Using 16S rRNA marker gene sequencing we determined the relative  
197 abundance of AABs and LABs in wild flies from five latitudes along the eastern United States  
198 coast in the fall of 2009 (Tables S1-2). Reads were clustered at the order levels since LABs are  
199 an order level designation; AABs, from the family Acetobacteraceae represented 99.97% of the  
200 Rhodospirillales reads (data not shown), and Rhodospirillales reads are referred to as AABs  
201 hereafter for simplicity. Consistent with our predictions, relative AAB and LAB abundances were  
202 negatively and positively correlated with latitude, respectively (Fig. 3A). The other taxa tested  
203 did not vary significantly with latitude.

204

205 **Figure 3. Latitudinal variation in the *D. melanogaster* microbiota.** (A) Relative abundances of  
206 reads assigned to different bacterial orders in a 16S rRNA marker gene survey of *D.*  
207 *melanogaster* collected in 2009. Spearman's rank correlations revealed significant positive and  
208 negative correlations between latitude and AAB or LAB read abundances, respectively.  $R_s$ ,  
209 Spearman's rho.  $p$ , p-value.  $N=2-3$  replicate pools of 10 flies each per geographic site. (B-C)  
210 Relative abundance of AABs (red) and LABs (blue) in isofemale lines derived from Maine (ME)  
211 – and Florida (FL)- wild populations, when reared under gnotobiotic conditions. B) Flies were  
212 reared with a 5-species microbiota, including 3 LABs isolated from laboratory *D. melanogaster*.  
213 C) Flies were reared with a 6-species gnotobiotic microbiota, including 4 LABs isolated from wild  
214 *D. melanogaster*. The difference between relative LAB and AAB abundance was determined by  
215 a generalized linear mixed (GLM) effects model using a binomial family.  $F$ ,  $F$  statistic of the  
216 GLM.  
217  
218 We then tested if host genetic selection on the microbiota could contribute to the observed  
219 latitude-specific microbiota differences. We inoculated bacteria-free fly lines that were recently  
220 derived from wild fly populations collected at the extrema of the eastern US (Maine, ME = high  
221 latitude, Florida, FL = low latitude) with defined microbial communities of AABs and LABs. The  
222 first experiment using our standard 5-species bacterial community derived from laboratory  
223 *Drosophila* (as in Fig. 2A-D) obtained a nearly significant difference in the relative abundance of  
224 AABs and LABs between the ME- and FL genotype flies ( $p= 0.07$ ), and low overall relative  
225 abundance of LABs (Fig. 3B). The second experiment replaced the laboratory LABs by 4 LABs  
226 isolated from wild *Drosophila* (Table S3), yielding a four-fold increase of LABs in ME flies,  
227 relative to the first experiment, and a statistically significant difference between relative LAB  
228 abundance in ME and FL flies (Fig. 3C). These differences were largely driven by LAB  
229 abundance in the ME67 line and supported by the lack of any detectable LABs (limit of detection  
230 = 20 CFU fly<sup>-1</sup>) in 3 of 4 FL-derived fly lines (Fig. S2). The absolute AAB abundance did not

231 differ significantly between ME- and FL-derived flies in either of the two experiments (Figs. S1-  
232 2), suggesting a genetic effect primarily on LABs.

233

234 Taken together, a broad experimental approach using two different sets of wild-caught versus  
235 laboratory-reared wild flies indicates that: 1) *D. melanogaster* isolated from different  
236 geographies can select for microorganisms that confer traits consistent with their geographic  
237 adaptation; 2) the effect was more pronounced for LABs derived from natural populations than  
238 from laboratory cultures of *Drosophila*; and 3) host genetic control appeared to be stronger for  
239 LABs than for other associated bacteria.

240

241 *The microbiota influences the life history of wild D. melanogaster*

242 The wild flies analyzed above (Fig. 3A) bore a microbiota that was consistent with the life history  
243 strategy naturally adopted by those flies (21, 34, 70), raising the question whether microbiota  
244 variation was necessary for variation in life history traits in geographically-selected fly  
245 populations. We first assessed the contribution of host genotype to the life history strategies of  
246 locally adapted fly populations by measuring the development rate and SR in ME- and FL-  
247 derived fly populations reared under microbiologically-sterile conditions. Consistent with a host  
248 genetic role, the bacteria-free FL-fly genotypes adopted a 'fast' strategy relative to the bacteria-  
249 free ME-flies: they were less resistant to starvation stress and completed the developmental  
250 period more quickly (Fig. 4A-B). In the final set of experiments, we assessed how the microbiota  
251 might influence the life history traits of the geographically-adapted flies (Fig. 4C-D). When  
252 reared with a single AAB- or LAB-strain that conferred extreme life history phenotypes in our  
253 previous experiments, SR and development rate in high- and low-latitude flies were more similar  
254 based on the inoculated microbes than on host genotype. These findings show that microbial  
255 influence can override genetic adaptations to differences in life history strategy.

256

257 **Figure 4. Microbial presence and identity influence life history of wild derived fly lines.**  
258 Latitudinally adapted ME (dashed lines) and FL (solid lines) flies reared with different bacterial  
259 treatments were tested for variation in the period of development to eclosion (A,C) and SR (B,D)  
260 when reared bacteria-free (A, B); or in monoassociation with *A. tropicalis* (red lines) or *L.*  
261 *fructivorans* (blue lines) (C,D). Red or blue shading represents the capacity for variation in FL-  
262 or ME- derived flies, respectively, and shading is purple where these overlap. Except for C  
263 (triplicate vials in one experiment), all data were collected from triplicate vials in three separate  
264 experiments. Letters next to the legends represent significant differences between treatments,  
265 determined by a Cox-mixed effects survival model that included experimental replicate as a  
266 mixed effect.

267

## 268 **Discussion**

269 Decades of work have established that organisms adapt to their environments in response to  
270 local environmental variation (71-75). Historically, life history adaptation has been examined  
271 from the perspective of an organism's genetic adaptations to environmental circumstances that  
272 vary in different geographic locations, such as temperature, photoperiod, nutrient availability and  
273 predator pressure. Previous but recent work has also provided clear evidence that the  
274 microorganisms living within, on, or near a plant or animal exert substantial influence on host  
275 traits that contribute to the life history strategy, with evidence for latitudinal clines in microbiota  
276 composition in some animals, including humans, and plants (72-77). Here, we integrate these  
277 different bodies of literature to demonstrate that microorganisms associated with *D.*  
278 *melanogaster* are likely to influence local adaptation. The key findings of this study are twofold.  
279 First, the life history strategy of *D. melanogaster* along the "fast-slow" axis can be driven by the  
280 composition of the microbiota under experimental conditions. Second, the intrinsic host genetic  
281 factors that influence differences in life history strategy between natural populations at different

282 latitudes include host selection of bacterial partners with congruent effects on host life history  
283 traits.  
284  
285 This study revealed that the bacteria can function as a rheostat to determine the fast-slow  
286 strategy adopted by the host. The molecular basis of this effect may involve bacterial production  
287 or catabolism of key metabolites. For example, bacterial production of acetic acid and other  
288 fermentation products, as well as branched-chain amino acids, can influence the activity of  
289 Insulin-like /Target of rapamycin (IIS/TOR) signaling (57, 58). IIS/TOR signaling has a central  
290 role in regulating cell and organismal growth, as well as female fecundity, and, consequently,  
291 life history strategies (78, 79). The life history traits of *D. melanogaster* can also be influenced  
292 by bacterial metabolism of glucose (59, 80) and methionine (64), and by B vitamin production  
293 (81, 82). The contributions of these different functions to *D. melanogaster* fitness are not known  
294 but one or more are likely to be important for *D. melanogaster* adaptation. Specifically, the  
295 insect host may utilize the composition of associated bacteria, or of bacteria in the diet, as a cue  
296 for environmental conditions (especially diet condition) in the fruit or other ephemeral habitat  
297 that support larval development. Thus, the many Acetobacteriaceae that are highly competitive  
298 in aerobic environments with high concentrations of sugars and other readily assimilated  
299 nutrients (40, 83) may represent a reliable cue for high-nutrient but ephemeral resources,  
300 favoring a “fast” phenotype of the host; while many Lactobacillales, which utilize complex carbon  
301 and nitrogen sources that are consumed more slowly (84), favor a “slow” phenotype of the host.  
302 Evidence from several studies suggest that the blend of fermentation products produced by  
303 microbial communities of different composition in the food and gut of *Drosophila* may represent  
304 a reliable cue for habitats of different nutritional content and persistence (85-87).  
305

306 We have also obtained evidence that host genetic selection of its microbiota plays a key role in  
307 shaping the fast-slow strategy adopted by *D. melanogaster*. Consistent with this finding, there is  
308 a strong overlap between *D. melanogaster* genes associated with local adaptation and host-  
309 microbe interactions. For example, of 160 previously identified genes that vary in flies across  
310 latitudinal gradients (89), 45% have known or predicted (GWA, transcription) effects on  
311 microbiota interactions (44, 90, 91) relative to 31% of 13991 total *D. melanogaster* genes. ( $X^2 =$   
312 7.03,  $p = 0.008$ ). A causal role of the microbiota in these correlations is indicated by the  
313 demonstration that TAG content of *D. melanogaster* is regulated in part through genetic control  
314 of the microbiota (44). Furthermore, the genetic determinants of *Acetobacter* abundance in *D.*  
315 *melanogaster* include many genes that are expressed predominantly or exclusively in neurons  
316 (44), raising the possibility that sensory functions and behavioral traits (e.g. response to  
317 microbial volatiles, diet preference and feeding rate) can mediate differences in microbiota  
318 composition. These considerations raise the possibility that an individual fly might modify its  
319 lifespan/fecundity schedule in response to altered environmental circumstances, by seeking out  
320 and filtering a different suite of microorganisms. An important topic for future research is the  
321 significance of host genetic factors in driving microbiota composition in natural populations of *D.*  
322 *melanogaster*. These host effects are more diffuse than in many associations, e.g. legume-  
323 rhizobia and squid-*Vibrio* symbioses, where exquisite specificity is dictated by defined molecular  
324 interactions (92-95) because the *D. melanogaster* association is an open system, continually  
325 exposed to microbes ingested in the food. Other deterministic factors, e.g. among-microbe  
326 interactions, as well as stochastic processes (see Introduction), may reinforce or suppress the  
327 effect of host factors on microbiota composition. Although the relative importance of these  
328 different factors is largely unknown, the demonstration of host genetic determinants of  
329 microbiota in various open associations in animals suggests that host determinants of  
330 microbiota composition contributes to the fitness of natural populations (43, 46, 47, 96-101).

331

332 This study extends our understanding of natural populations by combining studies of the  
333 microbiota in natural populations of *D. melanogaster* and laboratory analysis of precisely-  
334 controlled host-microbe combinations. For example, axenic *D. melanogaster* is a contrived state  
335 not likely experienced by flies in the wild; but was essential for establishing the influence of  
336 associated microorganisms on the flies' genetic contributions to life history variation. Our work  
337 further emphasizes that an exclusive focus on laboratory systems can miss important  
338 interactions because it fails to reproduce the biological context underlying evolved interactions.  
339 Likely examples include the more uniform impact of *Drosophila*-derived bacteria than bacteria  
340 from other sources on fly fitness (Fig. 2A-D vs Fig. 2E-H); and, in wild flies, the difference in  
341 abundance between wild- and laboratory-fly-isolated LABs. Similarly, *Drosophila*-isolated  
342 *Acetobacter* are discordant for key functions (uric acid utilization and motility) but not taxonomy  
343 between wild- versus laboratory- flies (102). Several lines of evidence suggest that  
344 microorganisms that can persist in the flies for extended periods of time may be more prevalent  
345 in wild *Drosophila* than in long-term laboratory cultures (88, 103, 104). These issues are of  
346 general significance for the conduct of microbiome research, with parallels coming from the  
347 evidence that the microbiota of the mouse differs between laboratory inbred strains and wild (or  
348 pet-shop) mice, with associated major differences in host physiological traits, especially relating  
349 to the immune system (105-107).

350

351 The finding that the microbiota can mask host genetic determinants of life history traits is not  
352 without precedent. In particular, laboratory studies have revealed that the penetrance of various  
353 mutations on metabolic traits of *D. melanogaster* is altered, and frequently reduced, in flies  
354 colonized with microorganisms, relative to axenic flies (90). These effects cannot be attributed  
355 to a generalized dysfunction of axenic *D. melanogaster* because elimination of the microbiota  
356 has small or no fitness consequences for the host on nutrient-rich diets (55, 82), as used in this  
357 study (Fig. 2D). The comparison of life history traits in wild flies bearing either *A. tropicalis* or *L.*

358 *fructivorans* showed that altering the microbial community can mask host genotype, but should  
359 not be interpreted that all AABs or LABs confer life history traits of the same magnitude.  
360 Numerous studies of traits in monoassociated *Drosophila* reinforce the expectation that the  
361 microbial influences are species-specific and possibly even strain-specific (58-60, 64, 67, 102,  
362 108-111). Further research is required to elucidate the underlying mechanisms, and to establish  
363 the extent to which the impact of individual microbial taxa on host life history traits in  
364 monoassociations (as used in these experiments), or controlled multi-species associations (112)  
365 may be displayed in the taxonomically diverse microbial communities in natural fly populations.

366

367 In conclusion, the impact of the microbiota on the life history strategy of *D. melanogaster* is most  
368 unlikely to be a unique trait of this insect species. Microbial influence on life history traits of  
369 animals may be widespread, representing an important, but hitherto neglected, determinant of  
370 intraspecific variation, including local adaptation. We recommend that analysis of the microbiota  
371 is included as an integral part of research on life history traits and local adaptation in animals, to  
372 determine the magnitude of microbial effects in different systems, and to establish the proximate  
373 and ultimate mechanisms.

374

## 375 **Materials and Methods**

### 376 *Fly rearing and bacterial culture conditions*

377 Standard fly rearing conditions were at 25°C using a 12 hour light-dark cycle on a yeast-glucose  
378 (YG) diet (10% yeast, 10% glucose, 1.2% agar) containing 0.042% propionic acid and 0.04%  
379 phosphoric acid (67)). Fly lines are listed in Table S3. *Wolbachia* status of the flies was  
380 determined using the wsp691-R (5'-AAAAATTAACGCTACTCCA-3') and wsp81-F (5'-  
381 TGGTCCAATAAGTGATGAAGAAAC-3') as described previously (113).

382



383 To control bacterial exposure to particular microbial partners and to test for the influence of  
384 individual microbes on life history traits, we reared flies under bacteria-free conditions or from  
385 bacteria-free eggs with an inoculated, defined microbiota. Fly eggs were collected from grape  
386 juice plates, dechorionated in 0.6% sodium hypochlorite for two 2.5 minutes washes, rinsed  
387 three times with sterile water, and transferred to sterile YG diet (no acid preservative added) in a  
388 biosafety cabinet, as in our previous work (54). Bacteria-free eggs were left unmanipulated, or,  
389 to rear flies with a defined microbiota, were inoculated with 50  $\mu$ l bacterial culture that had been  
390 grown overnight and normalized to  $OD_{600}=0.1$ .

391  
392 Bacterial strains (Table S4) were cultured on specific media: modified MRS medium (mMRS;  
393 1.25% peptone, 0.75% yeast extract, 2% glucose, 0.5% sodium acetate, 0.2% dipotassium  
394 hydrogen phosphate, 0.2% triammonium citrate, 0.02% magnesium sulfate heptahydrate,  
395 0.005% manganese sulfate tetrahydrate, 1.2% agar (67)), potato medium (pot; [Sigma P6685]),  
396 lysogeny broth (LB; 1% tryptone, 0.5% yeast extract, 0.5% sodium chloride), and brain heart  
397 infusion (BHI, Sigma 53286). All strains were grown at 30°C except *Escherichia coli*, which was  
398 grown at 37°C. Strains grown under normoxia were shaken (liquid) or under ambient laboratory  
399 conditions (solid). Strains requiring hypoxia were grown statically (liquid) or in a sealed  
400 container flooded with CO<sub>2</sub> (solid).

401  
402 *Bacterial abundance*

403 Bacterial abundance was assessed in whole body fly homogenates. Flies from each vial were  
404 anesthetized and a pool of five flies was homogenized in 125  $\mu$ l homogenization buffer (10 mM  
405 Tris, pH 8, 1 mM EDTA, 0.1% Triton X-100 as in (59)) with 125  $\mu$ l Lysing Matrix D ceramic  
406 beads (MP Biomedicals 116540434) by shaking for 30-60s at 4.0 m/s in a FastPrep-24 or 1500  
407 RPM for 2 min on a GenoGrinder 2010. The homogenate was plated onto mMRS medium

408 twice, with dilution plating under normoxic or hypoxic conditions for enumeration of bacterial  
409 abundance; and a spot-test under the reverse (hypoxia or normoxia) conditions to test for  
410 contamination. After incubation the colony morphologies were inspected visually to confirm  
411 strain identity. Where  $\geq 200$  CFU fly<sup>-1</sup> of the expected bacterial strain were detected, the strain  
412 was deemed 'present'. Differences between *Acetobacter* strains could usually not be  
413 determined by colony morphology, so *Acetobacter* contamination of other *Acetobacter* strains  
414 cannot be ruled out.

415

#### 416 *Development rate of the flies*

417 *D. melanogaster* development rate to pupariation or eclosion was determined by counting the  
418 number of pupae formed at 1, 6.5, and 10 hours into the daily light cycle. For Fig. 4A, three  
419 separate experiments each with triplicate fly vials were performed for each treatment. For Fig.  
420 4C, eclosion was measured and analyzed in one experiment (triplicate vials).

421

#### 422 *Starvation resistance (SR)*

423 SR was determined in pools of ten 5-7-day-old female flies. Female flies were separated from  
424 under light CO<sub>2</sub>-anesthesia, and then incubated in fly vials containing 5 ml 1% agarose under  
425 standard fly rearing conditions. Fly mortality was recorded every six hours until all flies in a vial  
426 were dead. Three separate experiments each with triplicate fly vials were performed for each  
427 treatment.

428

#### 429 *Glucose content*

430 Glucose content was measured from homogenized pools of five 5-7 day-old female flies as in  
431 our previous work (59). Briefly, the pool of flies was homogenized in 10 mM Tris – 1 mM EDTA  
432 – 0.1% Triton X-100 buffer and analyzed by the Sigma Glucose Assay kit (GAGO20-1KT)  
433 according to manufacturer instructions.

434

435 *Lifespan*

436 *D. melanogaster* adult lifespan was measured by recording the number and sex of dead flies  
437 and transferring surviving flies to fresh sterile diet every 2-3 days until all flies in a vial were  
438 dead. For every transfer of adult flies (P generation) to fresh diet, one spent vial per week was  
439 retained for 2-3 weeks, when the offspring (F1 generation) were homogenized to check for  
440 bacterial persistence and contamination during transfer. Where  $\geq 200$  CFU fly<sup>-1</sup> of an  
441 unexpected bacterial species were detected in two consecutive weeks, the flies were deemed  
442 contaminated from the first date contamination was detected. For survival analysis, flies were  
443 marked as leaving the experiment alive at that time; for fitness analyses the vials were  
444 discarded. At least three separate experiments with triplicate fly vials were performed for each  
445 treatment.

446

447 *Fecundity*

448 *D. melanogaster* fecundity was determined over a 35 day period in monoassociated flies and  
449 defined as the number of F1 offspring that reached pupation in twice-weekly measures over a 4-  
450 week interval. First, 30-60 P generation *D. melanogaster* per vial were monoassociated with  
451 different bacterial strains. After >90% of flies had eclosed, P generation adults were serially  
452 transferred to sterile YG diet twice per week, between 8 and 10 hours into the daily light cycle,  
453 for 4 weeks. At 18 hours later (between 2 and 4 hours into the daily light cycle the following  
454 day), the flies were transferred to new, sterile food until the next cycle of 18 hour-fecundity  
455 measures. To ensure that the flies did not lose their bacteria during the frequent transfers, the  
456 diets for fecundity measures were inoculated with 50  $\mu$ l OD<sub>600</sub>=0.1 normalized bacteria two days  
457 before flies were transferred. Bacteria were normalized in PBS to nutrient supplementation from  
458 spent media during the transfer. Spent vials of serially-transferred P generation flies were stored  
459 at 20°C on an uncontrolled light cycle, approximately 6AM – 6PM, and the number of pupae that

460 formed after ~ two weeks was calculated and normalized to the number of P generation females  
461 per vial and the exact time the P generation spent in the vial. Contamination during transfers  
462 was monitored weekly as in the lifespan analysis. If at least two consecutive F1 vials contained  
463  $\geq 200$  CFU fly<sup>-1</sup> of an unexpected bacterial colony morphology, fecundity data for the P flies was  
464 discarded from all analyses. Early fecundity values (12-15 days post egg deposition) were used  
465 for the correlation analysis. For the other analyses, differences in fecundity between  
466 experiments were calculated on a 2-4 day sliding scale. Three separate experiments with  
467 triplicate vials were performed on three consecutive days and data were pooled and analyzed  
468 based on date of vial transfers.

469

470 Fitness was calculated from the twice-weekly fecundity data paired with fly survival  
471 measurements over the same period. Leslie matrices were created (68, 69) and eigenvalue  
472 lambda was calculated in R using the eigen function for each replicate vial. For each of  
473 fecundity and fitness measures, a Kruskal-Wallis rank sum test was used to assess treatment-  
474 level differences. If the Kruskal-Wallis test was significant, then differences between treatments  
475 were assessed by a mixed model (114) and a Tukey post-hoc test (115) for multiple  
476 comparisons..

477

#### 478 *16S rRNA marker gene analysis*

479 To test for microbiota composition of wild *D. melanogaster* the V4 region of the 16S rRNA  
480 marker gene was amplified from whole body homogenates of wild flies. In fall of 2009, wild flies  
481 were collected to empty fly vials, and *D. melanogaster* were sorted from the mixed species  
482 pools (if any) within 16 hours and stored in ethanol with < 100 other flies from the sample  
483 collection. DNA was extracted from triplicate pools of 5 whole-body flies by a salting out  
484 procedure (116). Briefly, fly bodies were homogenized in enzymatic lysis buffer with 20mg/ml  
485 lysozyme (Amresco, 0663) and disrupted using glass beads. Cells were then lysed via

486 incubation with 10X extraction buffer and proteinase K. After incubation with 3 M sodium  
487 acetate, DNA was extracted from the pellet using 100% isopropanol, rinsed in 70% ethanol and  
488 resuspended in sterile TE buffer. From these extracts, the V4 region of the 16S rRNA gene was  
489 amplified as described previously (117). Sequences were normalized using the Invitrogen  
490 Normalization kit and sequenced via 2 x 250 Illumina v2 chemistry on a HiSeq 2500 at the BYU  
491 DNA sequencing center. Sequence reads are available at NCBI (*Accession number*  
492 *forthcoming*).

493

494 Operational taxonomic units were clustered and assigned to the sequencing data in QIIME 1.9.1  
495 using UCLUST with open-reference OTU picking and the GreenGenes Core reference  
496 alignment at 97% similarity (118-122). Taxonomy was assigned with the RDP Classifier 2.2  
497 (122) and the GreenGenes reference database (123, 124). *Wolbachia* reads were filtered from  
498 the OTU table, which was rarefied to 65 reads per sample, which was still sufficient to near-  
499 saturate most samples (Fig. S3). Spearman rank correlations between order-level OTU  
500 classifications (LABs = Lactobacillales, AABs = Rhodospirillales, almost all from  
501 Acetobacteraceae), were performed in R.

502

### 503 *Host selection on the microbiota*

504 To test for host genetic selection on microbiota composition of clinically-adapted fly lines, we  
505 enumerated bacterial abundance in *D. melanogaster* administered defined bacterial taxa. The  
506 defined 5-species bacterial community by inoculated bleach-sterilized fly eggs with an equal-  
507 ratios mixture (normalized to OD<sub>600</sub>=0.1) of *A. tropicalis*, *A. pomorum*, *L. brevis*, *L. fructivorans*,  
508 and *L. plantarum* (Table S4, 5-sp). The microbial communities associated with the flies were  
509 assessed by dilution plating whole body homogenates of 5 pooled male flies. Whole-body fly  
510 homogenates were prepared in 125 µl TET buffer (10 mM Tris pH 8, 1 mM EDTA 0.1% Triton  
511 X100) with an equal volume of Lysing Matrix D ceramic beads (MP Biomedicals) by shaking on

512 a FastPrep24 at 4.0 m/s. Visual differences in colony color and morphology were used to  
513 distinguish *Lactobacillaceae* (large, white or yellow) and *Acetobacter* (small, tan) colonies. In a  
514 followup study the same fly lines were reared with a 6-species inoculum composed of 4  
515 *Lactobacillaceae* species isolated from wild *Drosophila* and the two previously used *Acetobacter*  
516 strains, which were isolated from laboratory *Drosophila* (strains DmW\_98, DmW\_103,  
517 DmW\_181, DmW\_196, apoc, atrc; Table S4). Samples were prepared and microbiota  
518 composition was enumerated by the same methods as above.

519

#### 520 *Statistical analyses*

521 To define the relationships between life history traits in monoassociated CantonS flies, Pearson  
522 (if normal by a Shapiro test) or Spearman (if not normal by a Shapiro test) rank correlations  
523 between mean phenotype values were calculated in R (125). All assays were performed on the  
524 same fly genotype using the same diet formulation, bacterial strains, and general methods. One  
525 major bifurcation in the data is that the previously published TAG content, development rate,  
526 feeding rate, and glucose content data were collected in Ithaca, NY; whereas the SR, lifespan,  
527 and fecundity data were collected in Provo, UT. The previously published data were used for  
528 different purposes, and this is a nonredundant analysis of those data.

529

530 To test for genotype by microbiota differences in development rate or SR, Cox mixed effects  
531 models were used (126, 127). Model complexity was determined by selecting the model with the  
532 lowest AIC score. Differences in microbiota composition were defined by Kruskal-Wallis rank  
533 sum tests or linear mixed effects models with a binomial family (114).

534

535 To test for statistically significant differences in the CFU abundance data we employed 2  
536 approaches. First, we examined the raw CFU counts as a ratio of *Lactobacillaceae* to  
537 *Acetobacter* abundance in flies grouped by geographic cline or fly genotype using a generalized

538 linear mixed effects model with a binomial family (114, 115, 125). If there was a cline-specific  
539 difference, then the difference in the microbiota of fly lines was tested using fly genotype as a  
540 fixed effect instead of geographic cline. We also compared the absolute abundances of the  
541 bacteria. A Shapiro test was used to confirm the CFU abundances were not distributed normally  
542 and differences between bacterial abundances in lines from ME- and FL- geographies were  
543 determined by a Kruskal-Wallis test. Differences in bacterial abundances by fly line were  
544 determined by a Dunn test with Benjamini-Hochberg correction after confirming a significant line  
545 effect by a Kruskal-Wallis test. All tests were performed in R. (125, 128, 129).

546

#### 547 *Data sharing*

548 All fly lines and bacterial strains will be made freely available upon request to the corresponding  
549 author. Sequence data are uploaded to public databases (*Accession number forthcoming*).

550

#### 551 **Acknowledgements**

552 We thank Drs. Jerry Johnson and Byron Adams for helpful discussions.

553

554 **References**

- 555 1. Hereford J. A quantitative survey of local adaptation and fitness trade-offs. *Am Nat.*  
556 2009;173(5):579-88.
- 557 2. Stearns SC. *Evolution of Life Histories: Theory and Analysis*. New York: Oxford  
558 University Press; 1992.
- 559 3. Promislow DE, Harvey PH. Living fast and dying young: A comparative analysis of life-  
560 history variation among mammals. *J Zool.* 1990;220:417-37.
- 561 4. Ricklefs RE, Wikelski M. The physiology/life-history nexus. *Trends Ecol Evol.*  
562 2002;17(10):462-8.
- 563 5. Lemaitre JF, Berger V, Bonenfant C, Douhard M, Gamelon M, Plard F, et al. Early-late  
564 life trade-offs and the evolution of ageing in the wild. *Proc Biol Sci.* 2015;282(1806):20150209.
- 565 6. MacArthur RH, Wilson EO. *The Theory of Island Biogeography*. Princeton, NJ: Princeton  
566 University Press; 1967.
- 567 7. Pianka ER. R-Selection and K-Selection. *Am Nat.* 1970;104(940):592-&.
- 568 8. Munch SB, Salinas S. Latitudinal variation in lifespan within species is explained by the  
569 metabolic theory of ecology. *Proc Natl Acad Sci U S A.* 2009;106(33):13860-4.
- 570 9. Keller SR, Levsen N, Ingvarsson PK, Olson MS, Tiffin P. Local selection across a  
571 latitudinal gradient shapes nucleotide diversity in balsam poplar, *Populus balsamifera* L.  
572 *Genetics.* 2011;188(4):941-52.
- 573 10. Reale D, Garant D, Humphries MM, Bergeron P, Careau V, Montiglio PO. Personality  
574 and the emergence of the pace-of-life syndrome concept at the population level. *Philos Trans R*  
575 *Soc Lond B Biol Sci.* 2010;365(1560):4051-63.
- 576 11. McFall-Ngai M, Hadfield MG, Bosch TC, Carey HV, Domazet-Loaso T, Douglas AE, et al.  
577 Animals in a bacterial world, a new imperative for the life sciences. *Proc Natl Acad Sci U S A.*  
578 2013;110(9):3229-36.
- 579 12. Rook G, Backhed F, Levin BR, McFall-Ngai MJ, McLean AR. Evolution, human-microbe  
580 interactions, and life history plasticity. *Lancet.* 2017;390(10093):521-30.
- 581 13. Shapira M. Host-microbiota interactions in *Caenorhabditis elegans* and their  
582 significance. *Curr Opin Microbiol.* 2017;38:142-7.
- 583 14. Smith K, McCoy KD, Macpherson AJ. Use of axenic animals in studying the adaptation  
584 of mammals to their commensal intestinal microbiota. *Semin Immunol.* 2007;19(2):59-69.
- 585 15. Mushegian AA, Walsler JC, Sullam KE, Ebert D. The microbiota of diapause: How host-  
586 microbe associations are formed after dormancy in an aquatic crustacean. *J Anim Ecol.*  
587 2018;87(2):400-13.
- 588 16. Kohl KD. Diversity and function of the avian gut microbiota. *Journal of comparative*  
589 *physiology B, Biochemical, systemic, and environmental physiology.* 2012;182(5):591-602.
- 590 17. Douglas AE. The *Drosophila* model for microbiome research. *LabAnimal.*  
591 2018;47(6):157-64.
- 592 18. Neave MJ, Rachmawati R, Xun L, Michell CT, Bourne DG, Apprill A, et al. Differential  
593 specificity between closely related corals and abundant *Endozoicomonas* endosymbionts  
594 across global scales. *ISME J.* 2017;11(1):186-200.
- 595 19. Emmett BD, Youngblut ND, Buckley DH, Drinkwater LE. Plant phylogeny and life history  
596 shape rhizosphere bacterial microbiome of summer annuals in an agricultural field. *Front*  
597 *Microbiol.* 2017;8:2414.
- 598 20. Macke E, Tasiemski A, Massol F, Callens M, Decaestecker E. Life history and eco-  
599 evolutionary dynamics in light of the gut microbiota. *Oikos.* 2017;126(4):508-31.
- 600 21. Schmidt PS, Matzkin L, Ippolito M, Eanes WF. Geographic variation in diapause  
601 incidence, life-history traits, and climatic adaptation in *Drosophila melanogaster*. *Evolution.*  
602 2005;59(8):1721-32.



- 603 22. Parkash R, Rajpurohit S, Ramniwas S. Changes in body melanisation and desiccation  
604 resistance in highland vs. lowland populations of *D. melanogaster*. *J Insect Physiol*.  
605 2008;54(6):1050-6.
- 606 23. Sgro CM, Overgaard J, Kristensen TN, Mitchell KA, Cockerell FE, Hoffmann AA. A  
607 comprehensive assessment of geographic variation in heat tolerance and hardening capacity in  
608 populations of *Drosophila melanogaster* from eastern Australia. *J Evol Biol*. 2010;23(11):2484-  
609 93.
- 610 24. Lee SF, Chen Y, Varan AK, Wee CW, Rako L, Axford JK, et al. Molecular basis of  
611 adaptive shift in body size in *Drosophila melanogaster*: functional and sequence analyses of the  
612 *Dca* gene. *Mol Biol Evol*. 2011;28(8):2393-402.
- 613 25. Travers LM, Garcia-Gonzalez F, Simmons LW. Live fast die young life history in  
614 females: evolutionary trade-off between early life mating and lifespan in female *Drosophila*  
615 *melanogaster*. *Sci Rep*. 2015;5:15469.
- 616 26. Oakeshott JG, Chambers GK, Gibson JB, Willcocks DA. Latitudinal relationships of  
617 esterase-6 and phosphoglucosmutase gene frequencies in *Drosophila melanogaster*. *Heredity*.  
618 1981;47(Pt 3):385-96.
- 619 27. Umina PA, Weeks AR, Kearney MR, McKechnie SW, Hoffmann AA. A rapid shift in a  
620 classic clinal pattern in *Drosophila* reflecting climate change. *Science*. 2005;308(5722):691-3.
- 621 28. Schmidt PS, Zhu CT, Das J, Batavia M, Yang L, Eanes WF. An amino acid  
622 polymorphism in the couch potato gene forms the basis for climatic adaptation in *Drosophila*  
623 *melanogaster*. *Proc Natl Acad Sci U S A*. 2008;105(42):16207-11.
- 624 29. Overgaard J, Kristensen TN, Mitchell KA, Hoffmann AA. Thermal tolerance in  
625 widespread and tropical *Drosophila* species: does phenotypic plasticity increase with latitude?  
626 *Am Nat*. 2011;178 Suppl 1:S80-96.
- 627 30. Paaby AB, Bergland AO, Behrman EL, Schmidt PS. A highly pleiotropic amino acid  
628 polymorphism in the *Drosophila* insulin receptor contributes to life-history adaptation. *Evolution*.  
629 2014;68(12):3395-409.
- 630 31. Kolaczowski B, Kern AD, Holloway AK, Begun DJ. Genomic differentiation between  
631 temperate and tropical Australian populations of *Drosophila melanogaster*. *Genetics*.  
632 2011;187(1):245-60.
- 633 32. Bergland AO, Behrman EL, O'Brien KR, Schmidt PS, Petrov DA. Genomic evidence of  
634 rapid and stable adaptive oscillations over seasonal time scales in *Drosophila*. *Plos Genet*.  
635 2014;10(11):e1004775.
- 636 33. Bergland AO, Tobler R, Gonzalez J, Schmidt P, Petrov D. Secondary contact and local  
637 adaptation contribute to genome-wide patterns of clinal variation in *Drosophila melanogaster*.  
638 *Mol Ecol*. 2016;25(5):1157-74.
- 639 34. Sgro CM, Hoffmann AA. Genetic correlations, tradeoffs and environmental variation.  
640 *Heredity*. 2004;93(3):241-8.
- 641 35. Schmidt PS, Paaby AB. Reproductive diapause and life-history clines in North American  
642 populations of *Drosophila melanogaster*. *Evolution*. 2008;62(5):1204-15.
- 643 36. Corby-Harris V, Pontaroli AC, Shimkets LJ, Bennetzen JL, Habel KE, Promislow DE.  
644 Geographical distribution and diversity of bacteria associated with natural populations of  
645 *Drosophila melanogaster*. *Appl Environ Microbiol*. 2007;73(11):3470-9.
- 646 37. Ren C, Webster P, Finkel SE, Tower J. Increased internal and external bacterial load  
647 during *Drosophila* aging without life-span trade-off. *Cell Metab*. 2007;6(2):144-52.
- 648 38. Wong CN, Ng P, Douglas AE. Low-diversity bacterial community in the gut of the fruitfly  
649 *Drosophila melanogaster*. *Environ Microbiol*. 2011;13(7):1889-900.
- 650 39. Staubach F, Baines JF, Kunzel S, Bik EM, Petrov DA. Host species and environmental  
651 effects on bacterial communities associated with *Drosophila* in the laboratory and in the natural  
652 environment. *PLoS One*. 2013;8(8):e70749.

- 653 40. Wong AC, Luo Y, Jing X, Franzenburg S, Bost A, Douglas AE. The host as the driver of  
654 the microbiota in the gut and external environment of *Drosophila melanogaster*. *Appl Environ*  
655 *Microbiol.* 2015;81(18):6232-40.
- 656 41. Bost A, Franzenburg S, Adair KL, Martinson VG, Loeb G, Douglas AE. How gut  
657 transcriptional function of *Drosophila melanogaster* varies with the presence and composition of  
658 the gut microbiota. *Mol Ecol.* 2018;27(8):1848-59.
- 659 42. Wong AC, Chaston JM, Douglas AE. The inconstant gut microbiota of *Drosophila*  
660 species revealed by 16S rRNA gene analysis. *ISME J.* 2013;7(10):1922-32.
- 661 43. Rogers GB, Kozłowska J, Keeble J, Metcalfe K, Fao M, Dowd SE, et al. Functional  
662 divergence in gastrointestinal microbiota in physically-separated genetically identical mice. *Sci*  
663 *Rep.* 2014;4:5437.
- 664 44. Chaston JM, Dobson AJ, Newell PD, Douglas AE. Host genetic control of the microbiota  
665 mediates the *Drosophila* nutritional phenotype. *Appl Environ Microbiol.* 2016;82(2):671-9.
- 666 45. Coyte KZ, Schluter J, Foster KR. The ecology of the microbiome: Networks, competition,  
667 and stability. *Science.* 2015;350(6261):663-6.
- 668 46. Goodrich JK, Waters JL, Poole AC, Sutter JL, Koren O, Blehman R, et al. Human  
669 genetics shape the gut microbiome. *Cell.* 2014;159(4):789-99.
- 670 47. Goodrich JK, Davenport ER, Beaumont M, Jackson MA, Knight R, Ober C, et al. Genetic  
671 determinants of the gut microbiome in UK twins. *Cell Host Microbe.* 2016;19(5):731-43.
- 672 48. Rakoff-Nahoum S, Foster KR, Comstock LE. The evolution of cooperation within the gut  
673 microbiota. *Nature.* 2016;533(7602):255-9.
- 674 49. Smith CC, Snowberg LK, Gregory Caporaso J, Knight R, Bolnick DI. Dietary input of  
675 microbes and host genetic variation shape among-population differences in stickleback gut  
676 microbiota. *ISME J.* 2015;9(11):2515-26.
- 677 50. Adair KL, Wilson M, Bost A, Douglas AE. Microbial community assembly in wild  
678 populations of the fruit fly *Drosophila melanogaster*. *ISME J.* 2018;12(4):959-72.
- 679 51. Burns AR, Stephens WZ, Stagaman K, Wong S, Rawls JF, Guillemin K, et al.  
680 Contribution of neutral processes to the assembly of gut microbial communities in the zebrafish  
681 over host development. *ISME J.* 2016;10(3):655-64.
- 682 52. Jeraldo P, Sipos M, Chia N, Brulc JM, Dhillon AS, Konkel ME, et al. Quantification of the  
683 relative roles of niche and neutral processes in structuring gastrointestinal microbiomes. *Proc*  
684 *Natl Acad Sci U S A.* 2012;109(25):9692-8.
- 685 53. Venkataraman A, Bassis CM, Beck JM, Young VB, Curtis JL, Huffnagle GB, et al.  
686 Application of a neutral community model to assess structuring of the human lung microbiome.  
687 *mBio.* 2015;6(1).
- 688 54. Koyle ML, Veloz M, Judd AM, Wong AC, Newell PD, Douglas AE, et al. Rearing the fruit  
689 fly *Drosophila melanogaster* under axenic and gnotobiotic conditions. *J Vis Exp.* 2016(113).
- 690 55. Ridley EV, Wong AC, Westmiller S, Douglas AE. Impact of the resident microbiota on  
691 the nutritional phenotype of *Drosophila melanogaster*. *PLoS One.* 2012;7(5):e36765.
- 692 56. Brummel T, Ching A, Seroude L, Simon AF, Benzer S. *Drosophila* lifespan enhancement  
693 by exogenous bacteria. *Proc Natl Acad Sci U S A.* 2004;101(35):12974-9.
- 694 57. Shin SC, Kim SH, You H, Kim B, Kim AC, Lee KA, et al. *Drosophila* microbiome  
695 modulates host developmental and metabolic homeostasis via insulin signaling. *Science.*  
696 2011;334(6056):670-4.
- 697 58. Storelli G, Defaye A, Erkosar B, Hols P, Royet J, Leulier F. *Lactobacillus plantarum*  
698 promotes *Drosophila* systemic growth by modulating hormonal signals through TOR-dependent  
699 nutrient sensing. *Cell Metab.* 2011;14(3):403-14.
- 700 59. Chaston JM, Newell PD, Douglas AE. Metagenome-wide association of microbial  
701 determinants of host phenotype in *Drosophila melanogaster*. *mBio.* 2014;5(5):e01631-14.

- 702 60. Newell PD, Chaston JM, Wang Y, Winans NJ, Sannino DR, Wong ACN, et al. *In vivo*  
703 function and comparative genomic analyses of the *Drosophila* gut microbiota identify candidate  
704 symbiosis factors. *Front Microbiol.* 2014;5:576.
- 705 61. Clark RI, Salazar A, Yamada R, Fitz-Gibbon S, Morselli M, Alcaraz J, et al. Distinct  
706 Shifts in Microbiota Composition during *Drosophila* Aging Impair Intestinal Function and Drive  
707 Mortality. *Cell Rep.* 2015;12(10):1656-67.
- 708 62. Deshpande SA, Yamada R, Mak CM, Hunter B, Soto Obando A, Hoxha S, et al. Acidic  
709 Food pH Increases Palatability and Consumption and Extends *Drosophila* Lifespan. *J Nutr.*  
710 2015;145(12):2789-96.
- 711 63. Yamada R, Deshpande SA, Bruce KD, Mak EM, Ja WW. Microbes Promote Amino Acid  
712 Harvest to Rescue Undernutrition in *Drosophila*. *Cell Rep.* 2015.
- 713 64. Judd AM, Matthews MK, Hughes R, Veloz M, Sexton CE, Chaston JM. Bacterial  
714 methionine metabolism genes influence *Drosophila melanogaster* starvation resistance. *Appl*  
715 *Environ Microbiol.* 2018;Forthcoming.
- 716 65. Hoffmann AA, Harshman LG. Desiccation and starvation resistance in *Drosophila*:  
717 patterns of variation at the species, population and intrapopulation levels. *Heredity.* 1999;83 ( Pt  
718 6):637-43.
- 719 66. Kalra B, Parkash R. Trade-off of ovarian lipids and total body lipids for fecundity and  
720 starvation resistance in tropical populations of *Drosophila melanogaster*. *J Evol Biol.*  
721 2014;27(11):2371-85.
- 722 67. Newell PD, Douglas AE. Interspecies interactions determine the impact of the gut  
723 microbiota on nutrient allocation in *Drosophila melanogaster*. *Appl Environ Microbiol.*  
724 2014;80(2):788-96.
- 725 68. Leslie PH. On the use of matrices in certain population mathematics. *Biometrika.*  
726 1945;33(3):183-212.
- 727 69. Ellner SP, Guckenheimer J. *Dynamic Models in Biology*: Princeton University Press;  
728 2006.
- 729 70. Schmidt PS, Serrao EA, Pearson GA, Riginos C, Rawson PD, Hilbish TJ, et al.  
730 Ecological genetics in the North Atlantic: environmental gradients and adaptation at specific loci.  
731 *Ecology.* 2008;89(11 Suppl):S91-107.
- 732 71. Adrion JR, Hahn MW, Cooper BS. Revisiting classic clines in *Drosophila melanogaster*  
733 in the age of genomics. *Trends Genet.* 2015;31(8):434-44.
- 734 72. Koske RE. Distribution of *Va* mycorrhizal fungi along a latitudinal temperature-gradient.  
735 *Mycologia.* 1987;79(1):55-68.
- 736 73. Bueno CG, Moora M, M. G, Davison J, Opik M, Partel N, et al. Plant mycorrhizal status,  
737 but not type, shifts with latitude and elevation in Europe. *Glob Ecol Biogeogr.* 2017;26:690-9.
- 738 74. Reimer JD, Herrera M, Gatins R, Roberts MB, Parkinson JE, Berumen ML. Latitudinal  
739 variation in the symbiotic dinoflagellate *Symbiodinium* of the common reef zoantharian *Palythoa*  
740 *tuberculosa* on the Saudi Arabian coast of the Red Sea. *J Biogeogr.* 2017;44(3):661-73.
- 741 75. Savage AM, Goodson MS, Visram S, Trapido-Rosenthal H, Wiedenmann J, Douglas  
742 AE. Molecular diversity of symbiotic algae at the latitudinal margins of their distribution:  
743 dinoflagellates of the genus *Symbiodinium* in corals and sea anemones. *Mar Ecol Prog Ser.*  
744 2002;244:17-26.
- 745 76. Suzuki TA, Worobey M. Geographical variation of human gut microbial composition. *Biol*  
746 *Lett.* 2014;10(2):20131037.
- 747 77. Dikongue E, Segurel L. Latitude as a co-driver of human gut microbial diversity?  
748 *Bioessays.* 2017;39(3).
- 749 78. Oldham S. Obesity and nutrient sensing TOR pathway in flies and vertebrates:  
750 Functional conservation of genetic mechanisms. *Trends Endocrinol Metab.* 2011;22(2):45-52.

- 751 79. McGaugh SE, Bronikowski AM, Kuo CH, Reding DM, Addis EA, Fligel LE, et al. Rapid  
752 molecular evolution across amniotes of the IIS/TOR network. *Proc Natl Acad Sci U S A*.  
753 2015;112(22):7055-60.
- 754 80. Huang JH, Douglas AE. Consumption of dietary sugar by gut bacteria determines  
755 *Drosophila* lipid content. *Biol Lett*. 2015;11(9):20150469.
- 756 81. Sannino DR, Dobson AJ, Edwards K, Angert ER, Buchon N. The *Drosophila*  
757 *melanogaster* gut microbiota provisions thiamine to its host. *mBio*. 2018;9(2).
- 758 82. Wong AC, Dobson AJ, Douglas AE. Gut microbiota dictates the metabolic response of  
759 *Drosophila* to diet. *J Exp Biol*. 2014;217(Pt 11):1894-901.
- 760 83. Lievens B, Hallsworth JE, Pozo MI, Belgacem ZB, Stevenson A, Willems KA, et al.  
761 Microbiology of sugar-rich environments: diversity, ecology and system constraints. *Environ*  
762 *Microbiol*. 2015;17(2):278-98.
- 763 84. Duar RM, Lin XB, Zheng J, Martino ME, Grenier T, Perez-Munoz ME, et al. Lifestyles in  
764 transition: evolution and natural history of the genus *Lactobacillus*. *FEMS Microbiol Rev*.  
765 2017;41(Supp\_1):S27-S48.
- 766 85. Farine JP, Habbachi W, Cortot J, Roche S, Ferveur JF. Maternally-transmitted  
767 microbiota affects odor emission and preference in *Drosophila* larva. *Sci Rep*. 2017;7(1):6062.
- 768 86. Fischer CN, Trautman EP, Crawford JM, Stabb EV, Handelsman J, Broderick NA.  
769 Metabolite exchange between microbiome members produces compounds that influence  
770 *Drosophila* behavior. *eLife*. 2017;6.
- 771 87. Kim G, Huang JH, McMullen JG, 2nd, Newell PD, Douglas AE. Physiological responses  
772 of insects to microbial fermentation products: Insights from the interactions between *Drosophila*  
773 and acetic acid. *J Insect Physiol*. 2018;106(Pt 1):13-9.
- 774 88. Broderick NA, Buchon N, Lemaitre B. Microbiota-induced changes in *Drosophila*  
775 *melanogaster* host gene expression and gut morphology. *mBio*. 2014;5(3):e01117-14.
- 776 89. Fabian DK, Kapun M, Nolte V, Kofler R, Schmidt PS, Schlotterer C, et al. Genome-wide  
777 patterns of latitudinal differentiation among populations of *Drosophila melanogaster* from North  
778 America. *Mol Ecol*. 2012;21(19):4748-69.
- 779 90. Dobson AJ, Chaston JM, Newell PD, Donahue L, Hermann SL, Sannino DR, et al. Host  
780 genetic determinants of microbiota-dependent nutrition revealed by genome-wide analysis of  
781 *Drosophila melanogaster*. *Nat Commun*. 2015;6:6312.
- 782 91. Dobson AJ, Chaston JM, Douglas AE. The *Drosophila* transcriptional network is  
783 structured by microbiota. *BMC Genomics*. 2016;17(1):975.
- 784 92. Garg NS, Geetanjali. Symbiotic nitrogen fixation in legume nodules: process and  
785 signaling. A review. *Agron Sustain Dev*. 2007;27(1):59-68.
- 786 93. Gibson KE, Kobayashi H, Walker GC. Molecular determinants of a symbiotic chronic  
787 infection. *Annu Rev Genet*. 2008;42:413-41.
- 788 94. McFall-Ngai MJ. The importance of microbes in animal development: lessons from the  
789 squid-vibrio symbiosis. *Annu Rev Microbiol*. 2014;68:177-94.
- 790 95. Hillman K, Goodrich-Blair H. Are you my symbiont? Microbial polymorphic toxins and  
791 antimicrobial compounds as honest signals of beneficial symbiotic defensive traits. *Curr Opin*  
792 *Microbiol*. 2016;31:184-90.
- 793 96. Benson AK, Kelly SA, Legge R, Ma F, Low SJ, Kim J, et al. Individuality in gut microbiota  
794 composition is a complex polygenic trait shaped by multiple environmental and host genetic  
795 factors. *Proc Natl Acad Sci U S A*. 2010;107(44):18933-8.
- 796 97. Human Microbiome Project C. Structure, function and diversity of the healthy human  
797 microbiome. *Nature*. 2012;486(7402):207-14.
- 798 98. Blekhman R, Goodrich JK, Huang K, Sun Q, Bukowski R, Bell JT, et al. Host genetic  
799 variation impacts microbiome composition across human body sites. *Genome Biol*.  
800 2015;16:191.

- 801 99. Davenport ER, Cusanovich DA, Michelini K, Barreiro LB, Ober C, Gilad Y. Genome-  
802 Wide Association Studies of the Human Gut Microbiota. *PLoS One*. 2015;10(11):e0140301.
- 803 100. Bonder MJ, Kurilshikov A, Tigchelaar EF, Mujagic Z, Imhann F, Vila AV, et al. The effect  
804 of host genetics on the gut microbiome. *Nat Genet*. 2016;48(11):1407-12.
- 805 101. Gomez A, Espinoza JL, Harkins DM, Leong P, Saffery R, Bockmann M, et al. Host  
806 genetic control of the oral microbiome in health and disease. *Cell Host Microbe*. 2017;22(3):269-  
807 78 e3.
- 808 102. Winans NJ, Walter A, Chouaia B, Chaston JM, Douglas AE, Newell PD. A genomic  
809 investigation of ecological differentiation between free-living and *Drosophila*-associated  
810 bacteria. *Mol Ecol*. 2017;26(17):4536-50.
- 811 103. Blum JE, Fischer CN, Miles J, Handelsman J. Frequent replenishment sustains the  
812 beneficial microbiome of *Drosophila melanogaster*. *mBio*. 2013;4(6):e00860-13.
- 813 104. Pais IS, Valente RS, Sporniak M, Teixeira L. *Drosophila melanogaster* establishes a  
814 species-specific mutualistic interaction with stable gut-colonizing bacteria. *PLoS Biol*.  
815 2018;16(7):e2005710.
- 816 105. Beura LK, Hamilton SE, Bi K, Schenkel JM, Odumade OA, Casey KA, et al. Normalizing  
817 the environment recapitulates adult human immune traits in laboratory mice. *Nature*.  
818 2016;532(7600):512-6.
- 819 106. Masopust D, Sivula CP, Jameson SC. Of mice, dirty mice, and men: using mice to  
820 understand human immunology. *J Immunol*. 2017;199(2):383-8.
- 821 107. Weldon L, Abolins S, Lenzi L, Bourne C, Riley EM, Viney M. The gut microbiota of wild  
822 mice. *PLoS One*. 2015;10(8):e0134643.
- 823 108. Fast D, Duggal A, Foley E. Monoassociation with *Lactobacillus plantarum* disrupts  
824 intestinal homeostasis in adult *Drosophila melanogaster*. *mBio*. 2018;9(4).
- 825 109. Obadia B, Guvener ZT, Zhang V, Ceja-Navarro JA, Brodie EL, Ja WW, et al.  
826 Probabilistic Invasion Underlies Natural Gut Microbiome Stability. *Curr Biol*. 2017;27(13):1999-  
827 2006 e8.
- 828 110. Tefit MA, Leulier F. *Lactobacillus plantarum* favors the early emergence of fit and fertile  
829 adult *Drosophila* upon chronic undernutrition. *J Exp Biol*. 2017;220(Pt 5):900-7.
- 830 111. Martino ME, Joncour P, Leenay R, Gervais H, Shah M, Hughes S, et al. Bacterial  
831 Adaptation to the Host's Diet Is a Key Evolutionary Force Shaping *Drosophila-Lactobacillus*  
832 Symbiosis. *Cell Host Microbe*. 2018;24(1):109-19 e6.
- 833 112. Gould AL, Zhang V, Lamberti L, Jones EW, Obadia B, Gavryushkin A, et al. High-  
834 dimensional microbiome interactions shape host fitness. Preprint available from BioRxiv:  
835 232959 Cited August 13 2018.
- 836 113. Zhou W, Rousset F, O'Neil S. Phylogeny and PCR-based classification of *Wolbachia*  
837 strains using *wsp* gene sequences. *Proc Biol Sci*. 1998;265(1395):509-15.
- 838 114. Bates D, Maechler M, Bolker B, Walker S. lme4: Linear mixed-effects models using  
839 Eigen and S4. 1.1-7 ed2014.
- 840 115. Hothorn T, Bretz F, Westfall P. Simultaneous inference in general parametric models.  
841 *Biom J*. 2008;50(3):346-63.
- 842 116. Cenis JL, Perez P, Fereres A. Identification of aphid (Homoptera, Aphididae) species  
843 and clones by random amplified polymorphic DNA. *Ann Entomol Soc Am*. 1993;86(5):545-50.
- 844 117. Kozich JJ, Westcott SL, Baxter NT, Highlander SK, Schloss PD. Development of a dual-  
845 index sequencing strategy and curation pipeline for analyzing amplicon sequence data on the  
846 MiSeq Illumina sequencing platform. *Appl Environ Microbiol*. 2013;79(17):5112-20.
- 847 118. Wang Q, Garrity GM, Tiedje JM, Cole JR. Naive Bayesian classifier for rapid assignment  
848 of rRNA sequences into the new bacterial taxonomy. *Appl Environ Microbiol*. 2007;73(16):5261-  
849 7.
- 850 119. Caporaso JG, Bittinger K, Bushman FD, DeSantis TZ, Andersen GL, Knight R. PyNASt:  
851 a flexible tool for aligning sequences to a template alignment. *Bioinformatics*. 2010;26(2):266-7.

- 852 120. Caporaso JG, Kuczynski J, Stombaugh J, Bittinger K, Bushman FD, Costello EK, et al.  
853 QIIME allows analysis of high-throughput community sequencing data. *Nat Methods*.  
854 2010;7(5):335-6.
- 855 121. Edgar RC. Search and clustering orders of magnitude faster than BLAST.  
856 *Bioinformatics*. 2010;26(19):2460-1.
- 857 122. McDonald D, Price MN, Goodrich J, Nawrocki EP, DeSantis TZ, Probst A, et al. An  
858 improved Greengenes taxonomy with explicit ranks for ecological and evolutionary analyses of  
859 bacteria and archaea. *ISME J*. 2012;6(3):610-8.
- 860 123. Price MN, Dehal PS, Arkin AP. FastTree 2—approximately maximum-likelihood trees for  
861 large alignments. *PloS One*. 2010;5(3):e9490.
- 862 124. Werner JJ, Koren O, Hugenholtz P, DeSantis TZ, Walters WA, Caporaso JG, et al.  
863 Impact of training sets on classification of high-throughput bacterial 16s rRNA gene surveys.  
864 *ISME J*. 2012;6(1):94-103.
- 865 125. Core Team R. R: A Language and Environment for Statistical Computing. Vienna,  
866 Austria: R Foundation for Statistical Computing; 2016.
- 867 126. Therneau T. Mixed Effects Cox Models. 2.2-3 ed2012.
- 868 127. Therneau T. A Package for Survival Analysis in S. 2.37-7 ed2014.
- 869 128. Dinno A. dunn.test: Dunn's Test of Multiple Comparisons Using Rank Sums. . R package  
870 version 1.3.4. ed2017.
- 871 129. Mangiafico S. rcompanion: Functions to Support Extension Education Program  
872 Evaluation. R package version 1.10.1. ed2017.
- 873 130. Hammer AJ, Walters A, Carroll C, Newell PD, Chaston JM. Draft genome sequence of  
874 *Lactobacillus paracasei* DmW181, a bacterium isolated from wild *Drosophila*. *Genome*  
875 *Announc*. 2017;5(27):e00545-17.
- 876 131. Ricks NJ, Carroll C, Walters A, Newell PD, Chaston JM. Genome sequence of *Weissella*  
877 *cibaria* DmW\_103, isolated from wild *Drosophila*. *Genome Announc*. 2017;5(24):e00512-17.
- 878 132. Wright SM, Carroll C, Walters A, Newell PD, Chaston JM. Genome sequence of  
879 *Leuconostoc citreum* DmW\_111, isolated from wild *Drosophila*. *Genome Announc*.  
880 2017;5(24):e00507-17.
- 881

882 **Supporting information captions**

883 Figure S1. A,B) Relative CFU abundances of *Acetobacter* (red) and *Lactobacillus* (blue) in  
884 gnotobiotic 5-species fly lines isolated from wild-caught *D. melanogaster* in ME or FL, USA.

885 Differences between treatments were determined by a generalized linear mixed effects model  
886 with a binomial family followed by ANOVA and, where  $p < 0.05$  for the fixed effect, post-hoc

887 Tukey tests. Absolute CFU abundances of *Acetobacter* (C,D) and *Lactobacillus* (E,F) in

888 gnotobiotic 5-species fly lines derived from wild-caught *D. melanogaster* in ME, USA (blue) and  
889 FL, USA (red). All the inoculated *Lactobacillus* species were isolated from laboratory-reared *D.*

890 *melanogaster* (67). Differences between treatments were determined by a Kruskal-Wallis test

891 which, if  $p < 0.05$ , was followed by a Dunn's test.

892

893 Figure S2. A, B) Relative CFU abundances of *Acetobacter* (red) and *Lactobacillaceae* (blue) in

894 gnotobiotic 6-species (C,D) fly lines isolated from wild-caught *D. melanogaster* in ME or FL,

895 USA. Differences between treatments were determined by a generalized linear mixed effects

896 model with a binomial family followed by ANOVA and, where  $p < 0.05$  for the fixed effect, post-

897 hoc Tukey tests. Absolute CFU abundances of *Acetobacter* (C,D) and *Lactobacillaceae* (E,F) in

898 gnotobiotic 6-species fly lines derived from wild-caught *D. melanogaster* in ME, USA (blue) and

899 FL, USA (red). All the inoculated *Lactobacillus* species were isolated from wild *D. melanogaster*

900 (130-132); data not shown}. Differences between treatments were determined by a Kruskal-

901 Wallis test which, if  $p < 0.05$ , was followed by a Dunn's test.

902

903 Figure S3. Rarefaction analysis of microbiota data in Fig. 3A, performed using QIIME 1.9.1.

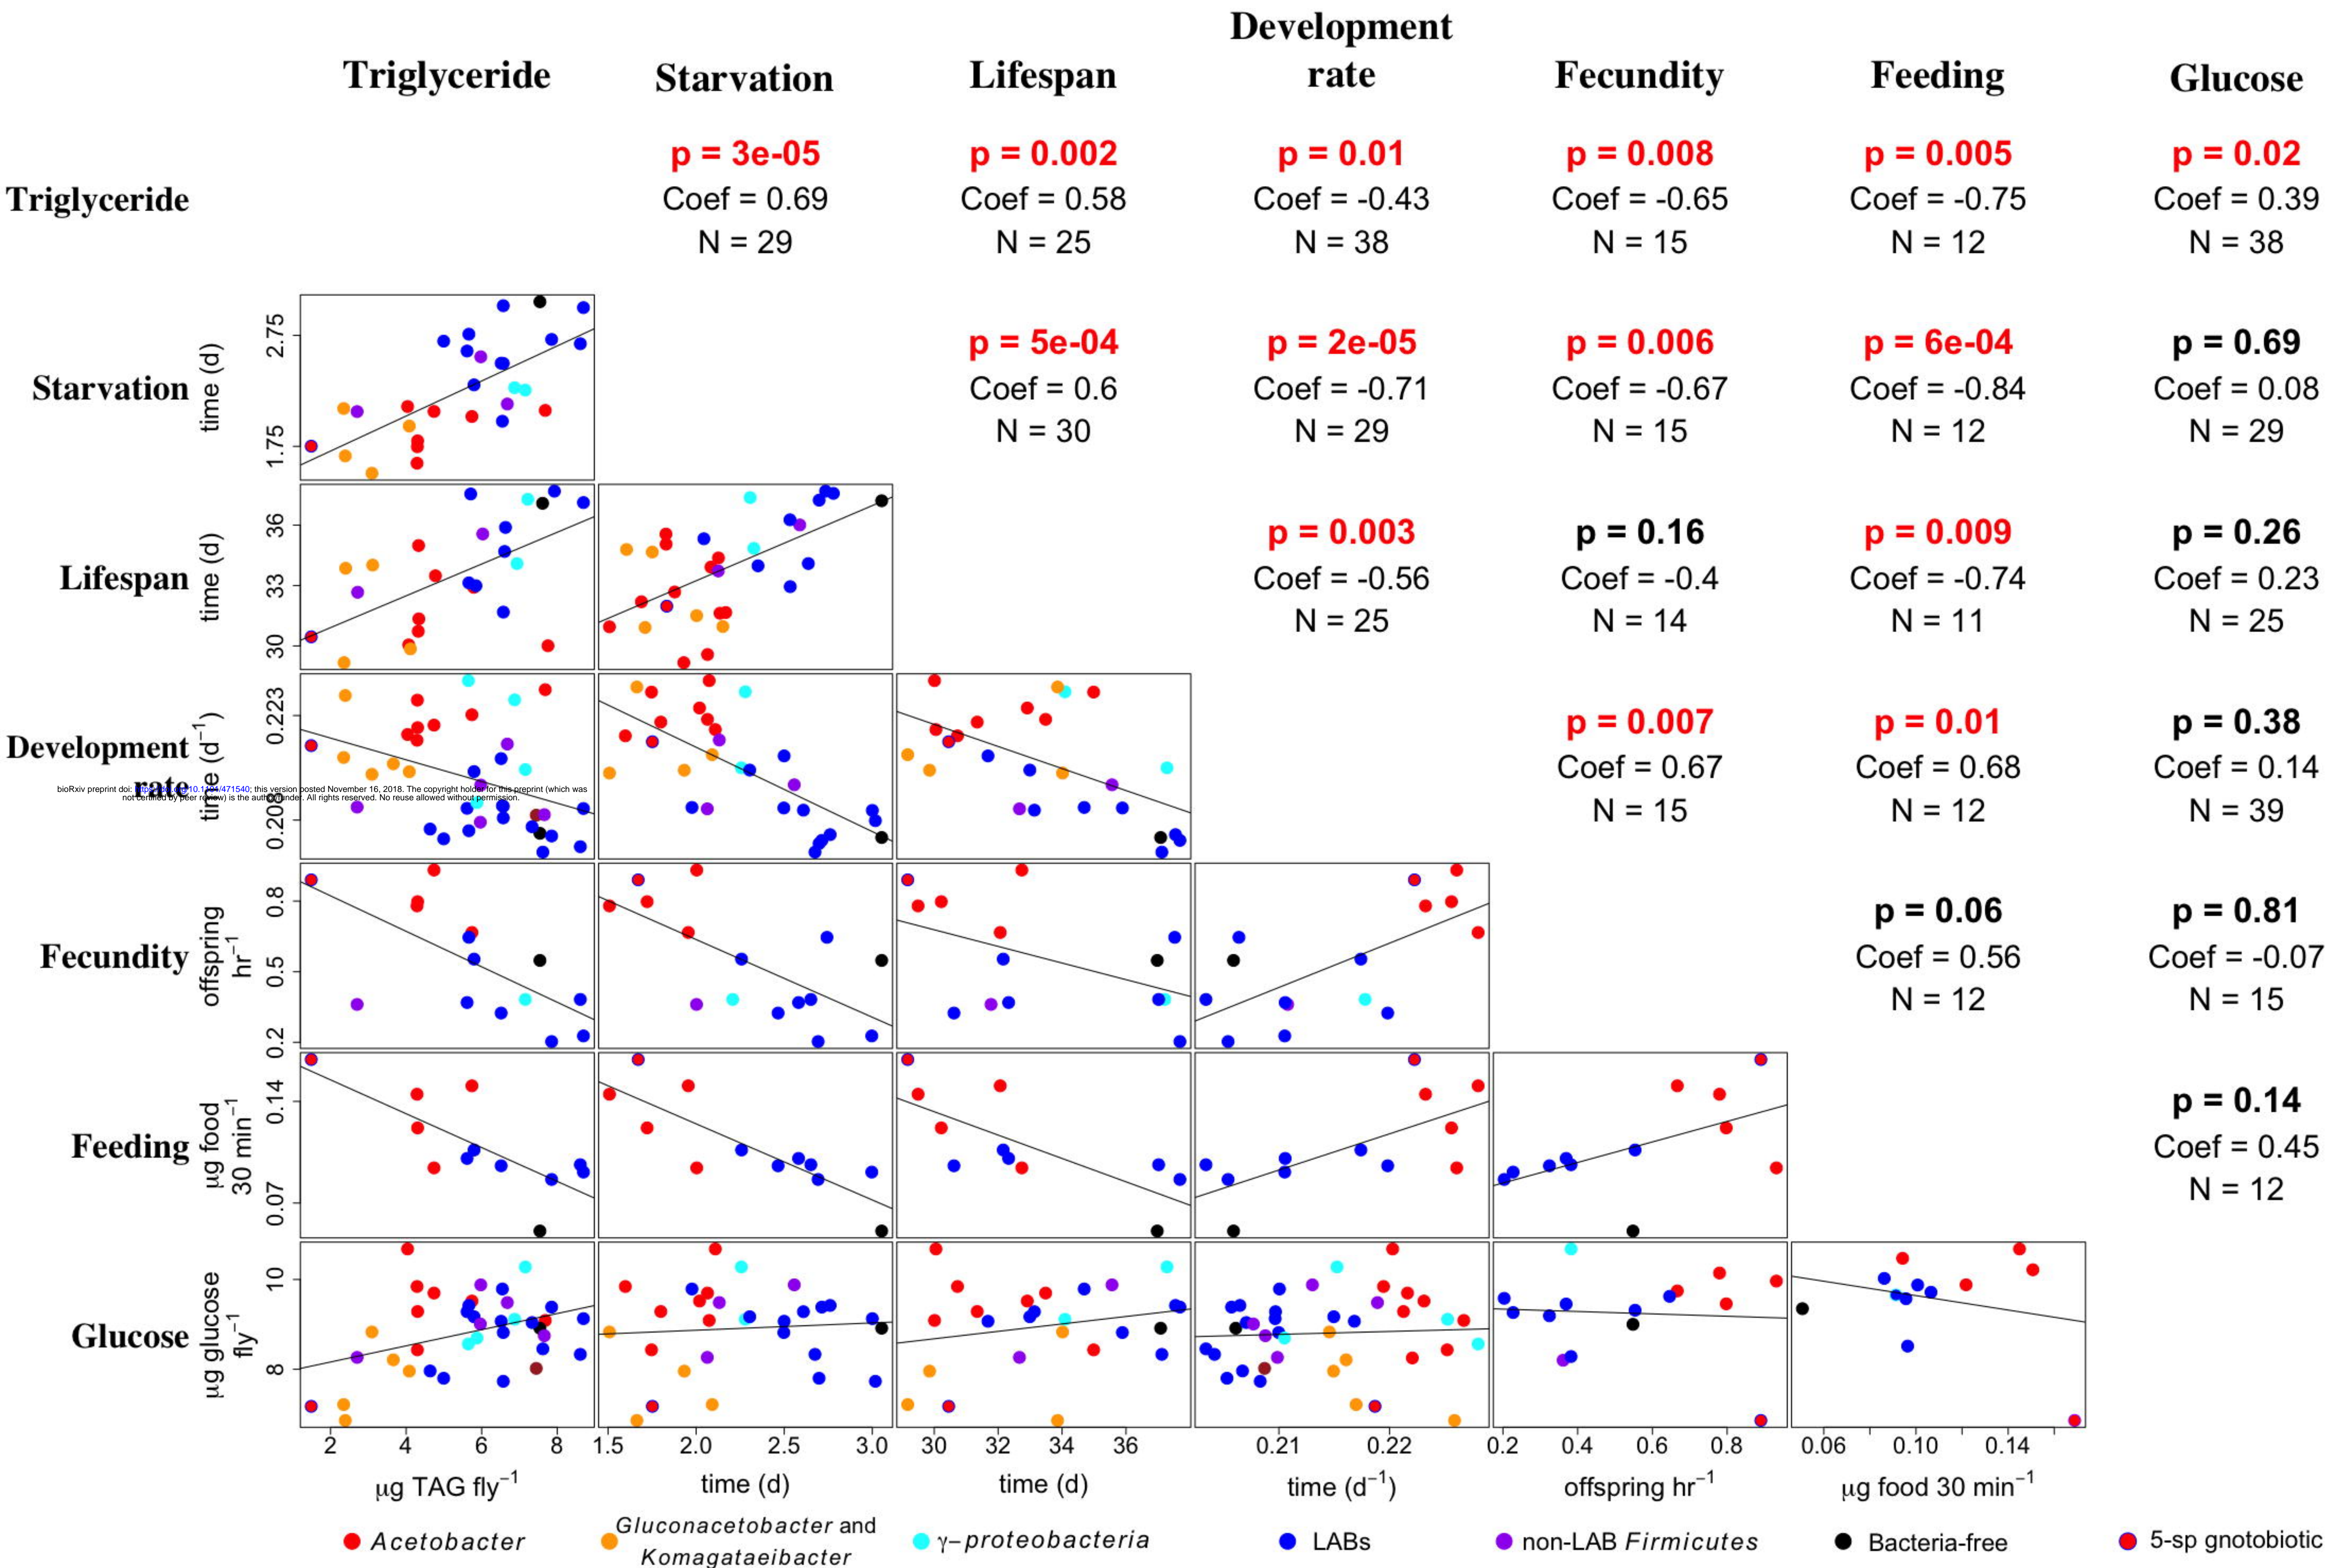



### Total Fecundity (12-34 dpd)

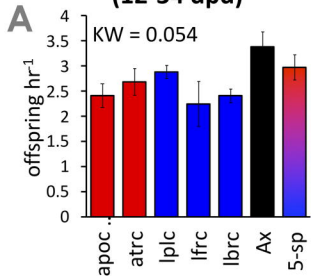

### Early Fecundity (12-13 dpd)

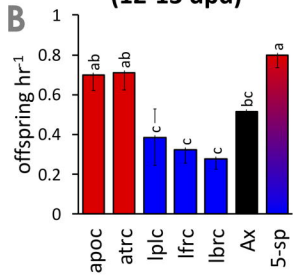

### Late Fecundity (32-34 dpd)

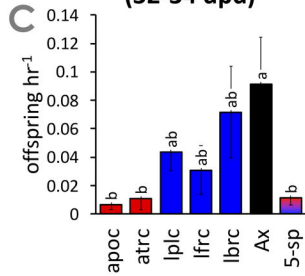

### Fitness

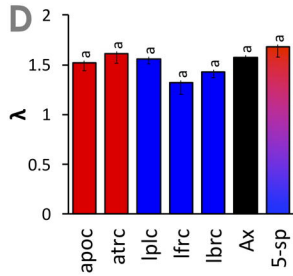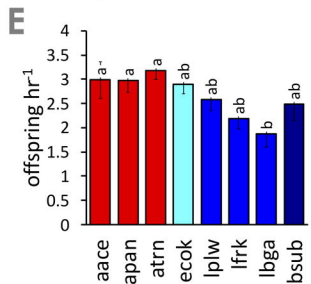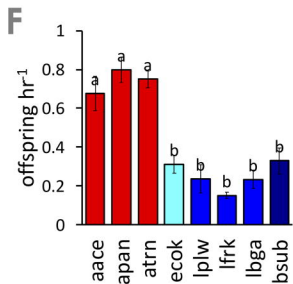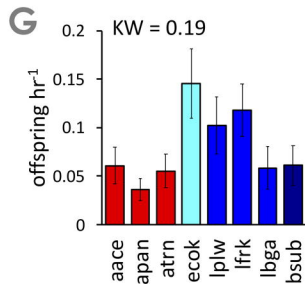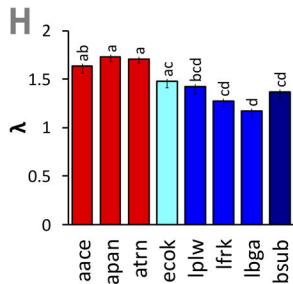

Bacterial strain

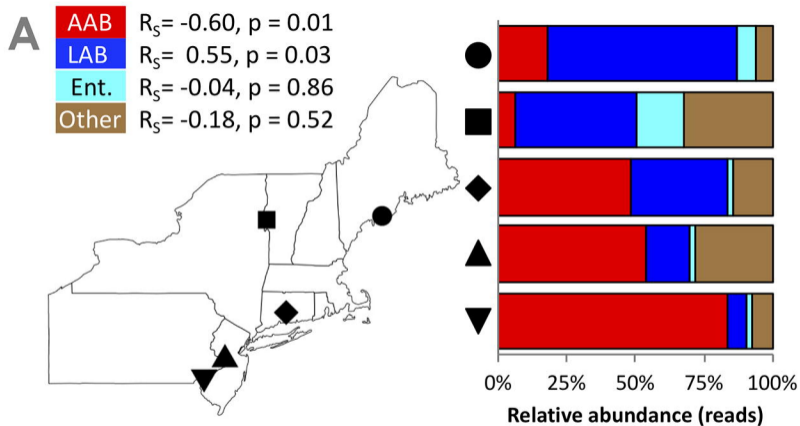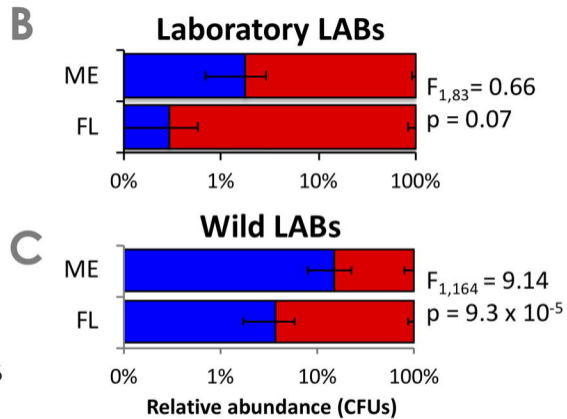

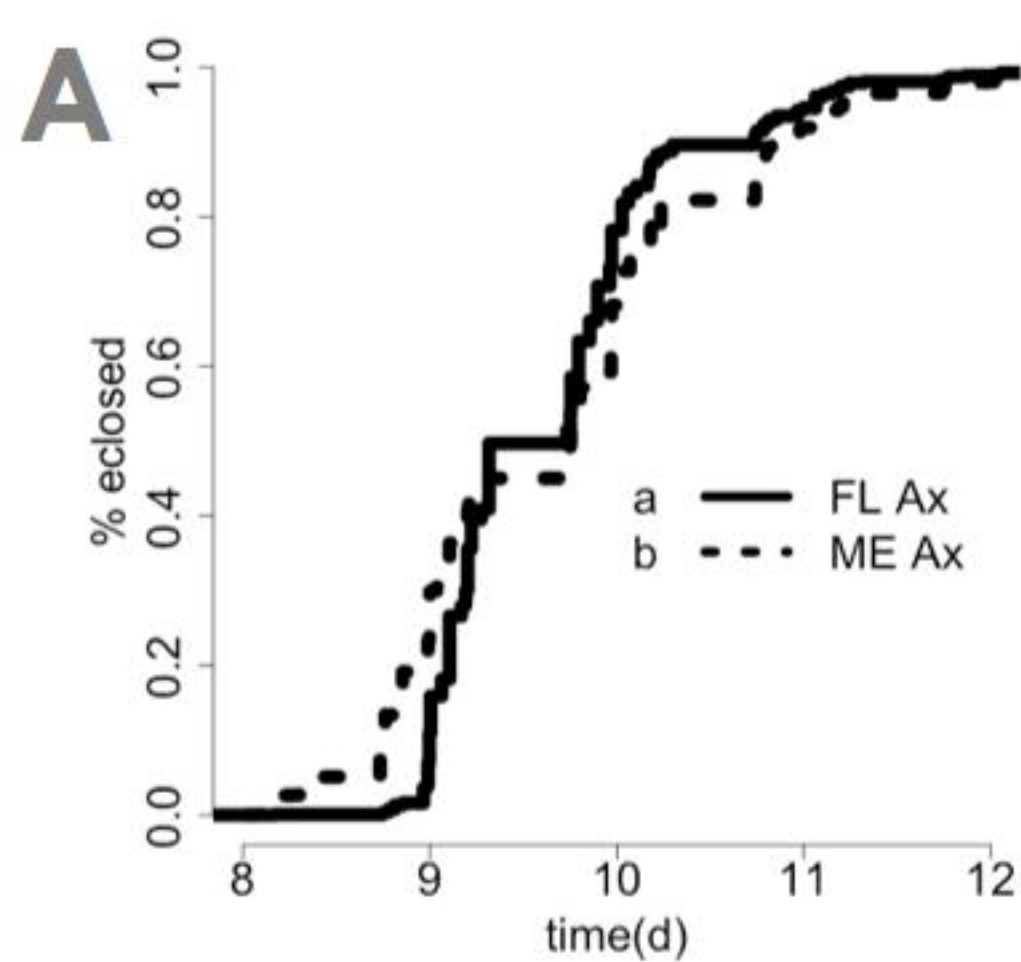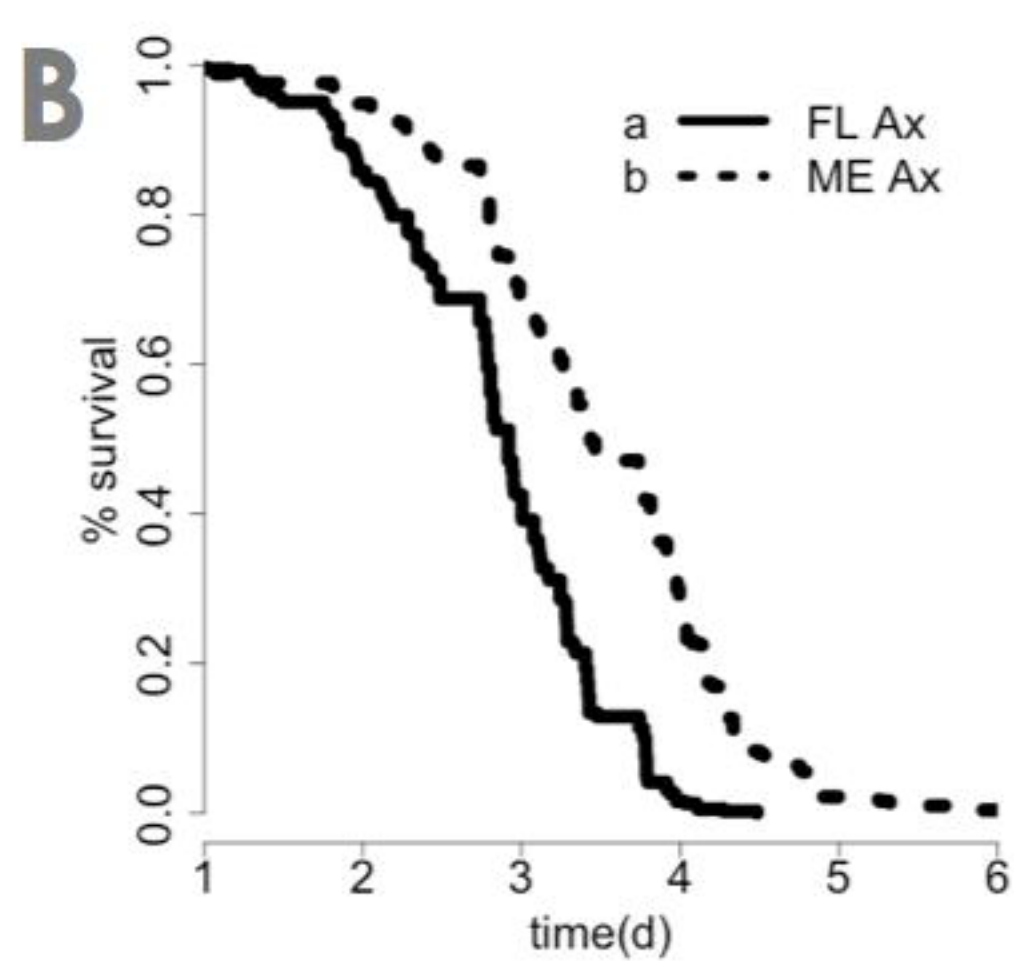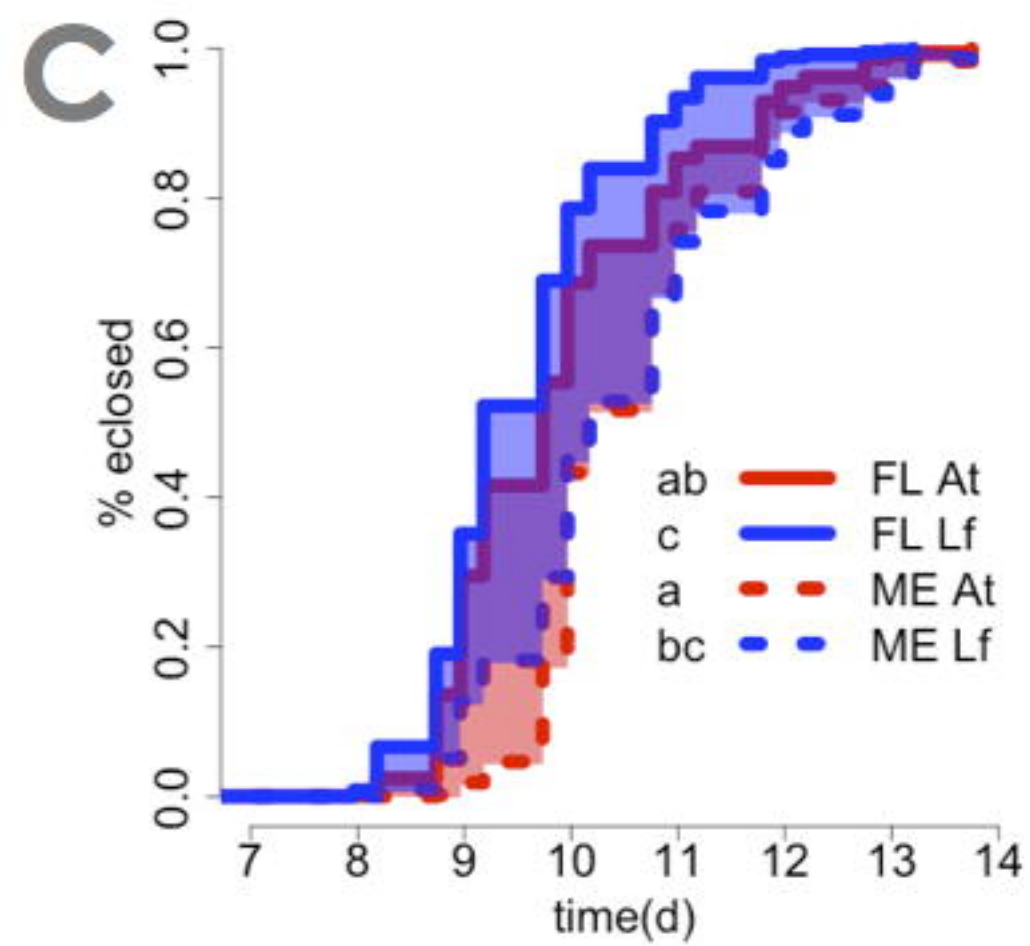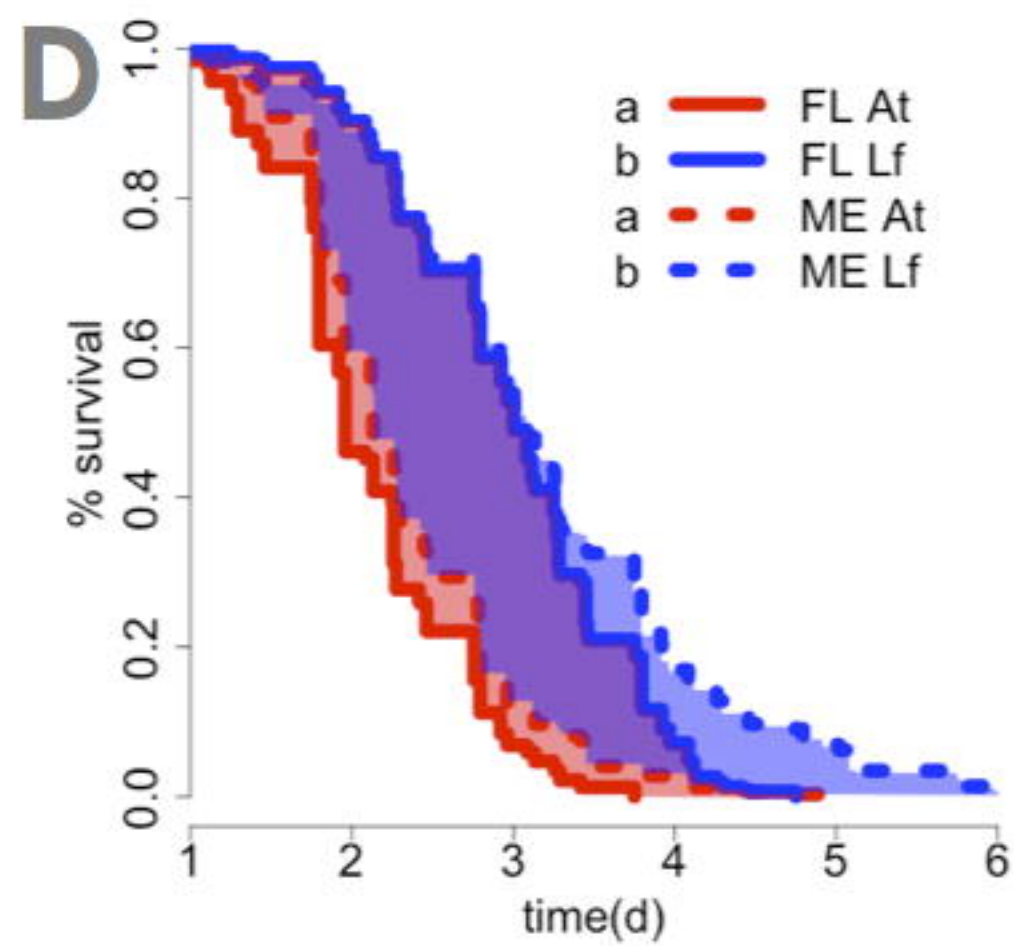

Source: http://biorxiv.org/content/10.1101/471540v1.full.pdf
